# Supplementary material for: Genome analysis of Streptococcus spp. isolates from animals in pre-antibiotic era with respect to antibiotic susceptibility and virulence gene profiles
Source: Springer Nature journal article supplement (doi:10.1186/s13567-024-01302-0), 2024-04-15
Supplement: MOESM6 [file 13567_2024_1302_MOESM6_ESM.pdf]

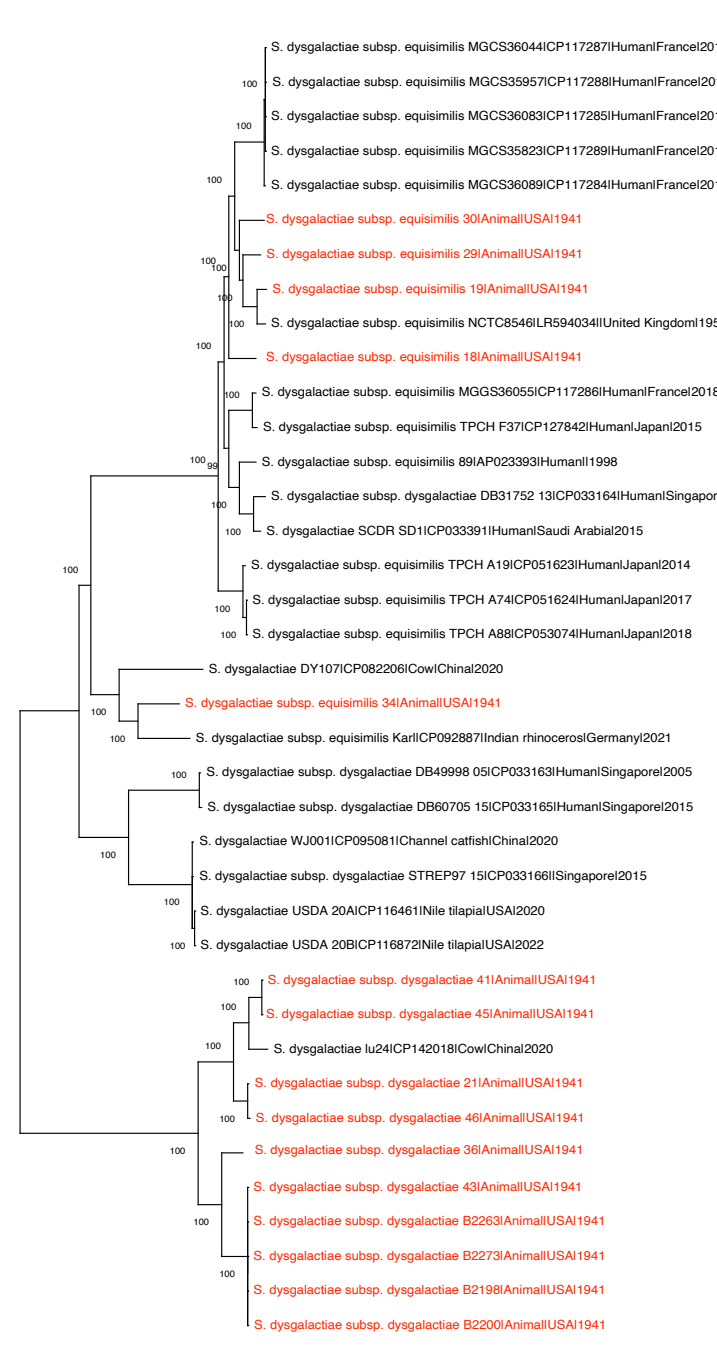

|                                                                                               | CP117287 | CP117288 | CP117285 | CP117289 | CP117284 | 30    | 29    | 19    | U8594034 | 18    | CP117286 | CP127842 | AP023393 | CP033164 | CP033391 | CP051623 | CP051624 | CP053074 | CP082206 | 34    | CP092887 | CP033163 | CP033165 | CP095081 | CP033166 | CP116461 | CP116872 | 41    | 45    | CP142018 | 21    | 46    | 36    | 43    | BZ2653 | BZ2731 | BZ198 | BZ200 |       |
|-----------------------------------------------------------------------------------------------|----------|----------|----------|----------|----------|-------|-------|-------|----------|-------|----------|----------|----------|----------|----------|----------|----------|----------|----------|-------|----------|----------|----------|----------|----------|----------|----------|-------|-------|----------|-------|-------|-------|-------|--------|--------|-------|-------|-------|
| <i>S. dysgalactiae</i> subsp. <i>equisimilis</i> MGCS36044ICP117287IHumanIFranceI2018         | CP117287 | 96.75    | 99.59    | 99.04    | 98.9     | 71.21 | 73.84 | 74.14 | 74.43    | 72.89 | 74.11    | 75.74    | 74.07    | 74.14    | 73.54    | 71       | 70.5     | 70.51    | 41.8     | 41.9  | 44       | 40.02    | 39.39    | 39.71    | 38.87    | 39.35    | 39.35    | 26.87 | 26.87 | 27.83    | 27.22 | 27.41 | 27.58 | 28.18 | 28.19  | 28.2   | 28.18 | 28.18 |       |
| <i>S. dysgalactiae</i> subsp. <i>equisimilis</i> MGCS35957ICP117288IHumanIFranceI2017         | CP117288 | 96.75    |          | 96.66    | 96.25    | 95.97 | 70.73 | 72.32 | 72.56    | 73.06 | 72.02    | 73.15    | 74.18    | 72.51    | 72.52    | 71.96    | 69.48    | 69.45    | 69.46    | 41.08 | 41.14    | 43.57    | 39.28    | 38.66    | 39.04    | 38.8     | 39.05    | 39.04 | 26.56 | 26.56    | 27.4  | 26.84 | 27    | 27.42 | 27.75  | 27.76  | 27.76 | 27.75 | 27.75 |
| <i>S. dysgalactiae</i> subsp. <i>equisimilis</i> MGCS36083ICP117285IHumanIFranceI2018         | CP117285 | 99.59    | 96.66    |          | 98.97    | 98.8  | 71.16 | 73.85 | 74.14    | 74.42 | 72.88    | 74.13    | 75.74    | 74.07    | 74.13    | 73.54    | 71.01    | 70.51    | 70.52    | 41.83 | 41.9     | 44       | 40.02    | 39.39    | 39.73    | 38.88    | 39.36    | 39.36 | 26.87 | 26.87    | 27.83 | 27.21 | 27.41 | 27.59 | 28.19  | 28.2   | 28.21 | 28.2  | 28.2  |
| <i>S. dysgalactiae</i> subsp. <i>equisimilis</i> MGCS35823ICP117289IHumanIFranceI2015         | CP117289 | 99.04    | 96.25    | 98.97    |          | 98.24 | 71.17 | 73.42 | 73.69    | 74.05 | 72.48    | 73.67    | 75.26    | 73.63    | 73.7     | 73.09    | 70.57    | 70.11    | 70.11    | 41.6  | 41.68    | 43.8     | 39.81    | 39.18    | 39.52    | 38.76    | 39.23    | 39.22 | 26.86 | 26.86    | 27.72 | 27.2  | 27.31 | 27.59 | 28.09  | 28.1   | 28.11 | 28.09 | 28.1  |
| <i>S. dysgalactiae</i> subsp. <i>equisimilis</i> MGCS36089ICP117284IHumanIFranceI2018         | CP117284 | 98.9     | 95.97    | 98.8     | 98.24    |       | 71.17 | 73.89 | 74.15    | 74.4  | 73.1     | 74.09    | 75.7     | 74.21    | 74.3     | 73.69    | 70.89    | 70.41    | 70.42    | 41.82 | 41.88    | 43.97    | 40.04    | 39.41    | 39.71    | 38.86    | 39.35    | 39.35 | 26.85 | 26.86    | 27.82 | 27.2  | 27.39 | 27.58 | 28.17  | 28.18  | 28.18 | 28.17 | 28.17 |
| <i>S. dysgalactiae</i> subsp. <i>equisimilis</i> 30IAnimalUSA1941                             | 30       | 71.21    | 70.73    | 71.16    | 71.17    | 71.17 |       | 76.67 | 73.92    | 75.49 | 73.71    | 74.08    | 73.82    | 69.43    | 69.67    | 72.87    | 69.97    | 69.87    | 69.87    | 40.39 | 42.81    | 43.98    | 38.61    | 39.19    | 39.76    | 39.2     | 39.57    | 39.57 | 27.31 | 27.31    | 27.31 | 27.87 | 27.49 | 27.77 | 27.21  | 27.22  | 27.23 | 27.21 | 27.22 |
| <i>S. dysgalactiae</i> subsp. <i>equisimilis</i> 29IAnimalUSA1941                             | 29       | 73.84    | 72.32    | 73.85    | 73.42    | 73.89 | 76.67 |       | 79.25    | 78.38 | 74.76    | 75.79    | 76.65    | 73.11    | 73.77    | 75.41    | 72.46    | 71.97    | 71.98    | 41.04 | 43.53    | 44.04    | 39.51    | 40.14    | 40.13    | 39.64    | 39.67    | 39.67 | 26.95 | 26.95    | 27.64 | 27.87 | 28.07 | 27.62 | 27.9   | 27.9   | 27.91 | 27.9  | 27.9  |
| <i>S. dysgalactiae</i> subsp. <i>equisimilis</i> 19IAnimalUSA1941                             | 19       | 74.14    | 72.56    | 74.14    | 73.69    | 74.15 | 73.92 | 79.25 |          | 85.84 | 75.64    | 73.9     | 75.2     | 72.31    | 71.9     | 74.42    | 71.05    | 69.97    | 69.97    | 40.88 | 42.23    | 44.27    | 39.66    | 40.33    | 40.3     | 39.9     | 40.08    | 40.08 | 27.08 | 27.08    | 27.54 | 27.48 | 27.67 | 27.08 | 27.64  | 27.65  | 27.65 | 27.65 | 27.64 |
| <i>S. dysgalactiae</i> subsp. <i>equisimilis</i> NCTC8546ILR594034IIUnited KingdomI1953       | U8594034 | 74.43    | 73.06    | 74.42    | 74.05    | 74.4  | 75.49 | 78.38 | 85.84    |       | 75.95    | 74.49    | 75.4     | 71.58    | 71.54    | 75.16    | 70.97    | 70.71    | 70.73    | 40.96 | 42.46    | 44.55    | 39.44    | 39.8     | 40.5     | 39.84    | 40.33    | 40.33 | 27.02 | 27.02    | 27.49 | 27.44 | 27.57 | 27.3  | 27.35  | 27.36  | 27.37 | 27.35 | 27.35 |
| <i>S. dysgalactiae</i> subsp. <i>equisimilis</i> 18IAnimalUSA1941                             | 18       | 72.89    | 72.02    | 72.88    | 72.48    | 73.1  | 73.71 | 74.76 | 75.64    | 75.95 |          | 74.24    | 74.47    | 71.58    | 70.91    | 74.03    | 71.5     | 70.75    | 70.75    | 41.46 | 43.09    | 45.2     | 39.7     | 40.17    | 40.72    | 40.4     | 40.62    | 40.62 | 27.79 | 27.79    | 28.15 | 28.01 | 28.13 | 28.13 | 27.93  | 27.94  | 27.95 | 27.93 | 27.93 |
| <i>S. dysgalactiae</i> subsp. <i>equisimilis</i> MGGS36055ICP117286IHumanIFranceI2018         | CP117286 | 74.11    | 73.15    | 74.13    | 73.67    | 74.09 | 74.08 | 75.79 | 73.9     | 74.49 | 74.24    |          | 93.15    | 75.45    | 71.94    | 74.38    | 71.98    | 71.73    | 71.73    | 39.93 | 42.02    | 43.42    | 38.9     | 39.29    | 39.05    | 38.8     | 39.11    | 39.11 | 26.62 | 26.63    | 27.18 | 27.04 | 27.18 | 26.98 | 26.85  | 26.85  | 26.87 | 26.85 | 26.85 |
| <i>S. dysgalactiae</i> subsp. <i>equisimilis</i> TPCH F37ICP127842IHumanIJapanI2015           | CP127842 | 75.74    | 74.18    | 75.74    | 75.26    | 75.7  | 73.82 | 76.65 | 75.2     | 75.4  | 74.47    | 93.15    |          | 75.91    | 73.38    | 75.89    | 73.18    | 72.8     | 72.8     | 40.36 | 42.32    | 43.74    | 39.29    | 39.76    | 39.55    | 38.79    | 39.27    | 39.27 | 26.84 | 26.84    | 27.49 | 27.28 | 27.47 | 26.88 | 27.16  | 27.16  | 27.18 | 27.16 | 27.16 |
| <i>S. dysgalactiae</i> subsp. <i>equisimilis</i> 89/AP023393IHumanI1998                       | AP023393 | 74.07    | 72.51    | 74.07    | 73.63    | 74.21 | 69.43 | 73.11 | 72.31    | 71.58 | 71.58    | 75.45    | 75.91    |          | 81.08    | 80.82    | 73.21    | 73.64    | 73.63    | 42.43 | 43.13    | 44.51    | 40.68    | 40.3     | 40.05    | 39.19    | 39.67    | 39.67 | 27.38 | 27.39    | 28.46 | 27.53 | 27.79 | 27.89 | 28.72  | 28.73  | 28.7  | 28.73 | 28.73 |
| <i>S. dysgalactiae</i> subsp. <i>dysgalactiae</i> DB31752 13ICP033164IHumanISingaporeI2013    | CP033164 | 74.14    | 72.52    | 74.13    | 73.7     | 74.3  | 69.67 | 73.77 | 71.9     | 71.54 | 70.91    | 71.94    | 73.38    | 81.08    |          | 84.66    | 71.99    | 72.36    | 72.36    | 42.41 | 43       | 44.39    | 40.36    | 39.85    | 40.08    | 39.56    | 39.51    | 39.51 | 27.27 | 27.28    | 28.49 | 27.49 | 27.72 | 28    | 28.67  | 28.68  | 28.65 | 28.68 | 28.68 |
| <i>S. dysgalactiae</i> subsp. <i>dysgalactiae</i> SCDR SD1ICP033391IHumanISaudi ArabiaI2015   | CP033391 | 73.54    | 71.96    | 73.54    | 73.09    | 73.69 | 72.87 | 75.41 | 74.42    | 75.16 | 74.03    | 74.38    | 75.89    | 80.82    | 84.66    |          | 76.61    | 76.68    | 76.67    | 43.16 | 44.79    | 46.57    | 41.17    | 41.78    | 41.8     | 40.8     | 41.31    | 41.31 | 28.42 | 28.42    | 28.84 | 28.82 | 29.07 | 28.46 | 28.94  | 28.94  | 28.93 | 28.93 | 28.94 |
| <i>S. dysgalactiae</i> subsp. <i>equisimilis</i> TPCH A19ICP051623IHumanIJapanI2014           | CP051623 | 71       | 69.48    | 71.01    | 70.57    | 70.89 | 69.97 | 72.46 | 71.05    | 70.97 | 71.5     | 71.98    | 73.18    | 73.21    | 71.99    | 76.61    |          | 93.01    | 93.02    | 41.57 | 43.28    | 44.51    | 39.5     | 40.22    | 40.6     | 39.57    | 40.1     | 40.1  | 27.49 | 27.49    | 27.83 | 28.35 | 28.63 | 27.93 | 28.46  | 28.47  | 28.47 | 28.46 | 28.47 |
| <i>S. dysgalactiae</i> subsp. <i>equisimilis</i> TPCH A74ICP051624IHumanIJapanI2017           | CP051624 | 70.5     | 69.45    | 70.51    | 70.11    | 70.41 | 69.87 | 71.97 | 69.97    | 70.71 | 70.75    | 71.73    | 72.8     | 73.64    | 72.36    | 76.68    | 93.01    |          | 99.66    | 41.74 | 43.54    | 44.88    | 39.79    | 40.29    | 40.42    | 39.43    | 39.96    | 39.96 | 27.66 | 27.67    | 27.98 | 28.48 | 28.75 | 28.21 | 28.57  | 28.58  | 28.58 | 28.57 | 28.57 |
| <i>S. dysgalactiae</i> subsp. <i>equisimilis</i> TPCH A88ICP053074IHumanIJapanI2018           | CP053074 | 70.51    | 69.46    | 70.52    | 70.11    | 70.42 | 69.87 | 71.98 | 69.97    | 70.73 | 70.75    | 71.73    | 72.8     | 73.63    | 72.36    | 76.67    | 93.02    | 99.66    |          | 41.75 | 43.53    | 44.9     | 39.78    | 40.28    | 40.42    | 39.43    | 39.96    | 39.96 | 27.67 | 27.68    | 27.98 | 28.49 | 28.76 | 28.21 | 28.57  | 28.58  | 28.58 | 28.57 | 28.57 |
| <i>S. dysgalactiae</i> DY107ICP082206ICowIChinaI2020                                          | CP082206 | 41.8     | 41.08    | 41.83    | 41.6     | 41.82 | 40.39 | 41.04 | 40.88    | 40.96 | 41.46    | 39.93    | 40.36    | 42.43    | 42.41    | 43.16    | 41.57    | 41.74    | 41.75    |       | 58.34    | 53.42    | 44.56    | 43.98    | 45.1     | 43.97    | 44.35    | 44.34 | 30.32 | 30.32    | 31.02 | 30.55 | 30.5  | 31.35 | 31.72  | 31.7   | 31.69 | 31.7  | 31.7  |
| <i>S. dysgalactiae</i> subsp. <i>equisimilis</i> 34IAnimalUSA1941                             | 34       | 41.9     | 41.14    | 41.9     | 41.68    | 41.88 | 42.81 | 43.53 | 42.23    | 42.46 | 43.09    | 42.02    | 42.32    | 43.13    | 43       | 44.79    | 43.28    | 43.54    | 43.53    | 58.34 |          | 64.64    | 47.97    | 48.61    | 49.55    | 47.34    | 47.93    | 47.93 | 31.1  | 31.1     | 31.34 | 31.68 | 31.94 | 31.2  | 31.54  | 31.53  | 31.52 | 31.54 | 31.54 |
| <i>S. dysgalactiae</i> subsp. <i>equisimilis</i> KarlICP092887IIndian rhinocerosIGermanyI2021 | CP092887 | 44       | 43.57    | 44       | 43.8     | 43.97 | 43.98 | 44.04 | 44.27    | 44.55 | 45.2     | 43.42    | 43.74    | 44.51    | 44.39    | 46.57    | 44.51    | 44.88    | 44.9     | 53.42 | 64.64    |          | 49.08    | 49.71    | 50.8     | 49.65    | 50.23    | 50.23 | 31.88 | 31.89    | 31.96 | 31.79 | 32.09 | 31.87 | 32.29  | 32.28  | 32.29 | 32.28 | 32.28 |
| <i>S. dysgalactiae</i> subsp. <i>dysgalactiae</i> DB49998 05ICP033163IHumanISingaporeI2005    | CP033163 | 40.02    | 39.28    | 40.02    | 39.81    | 40.04 | 38.61 | 39.51 | 39.66    | 39.44 | 39.7     | 38.9     | 39.29    | 40.68    | 40.36    | 41.17    | 39.5     | 39.79    | 39.78    | 44.56 | 47.97    | 49.08    |          | 92.64    | 57.44    | 56.57    | 57.35    | 57.35 | 30.01 | 30.01    | 31.16 | 30.22 | 30.51 | 31.43 | 32.05  | 32.05  | 32.06 | 32.05 | 32.05 |
| <i>S. dysgalactiae</i> subsp. <i>dysgalactiae</i> DB60705 15ICP033165IHumanISingaporeI2015    | CP033165 | 39.39    | 38.66    | 39.39    | 39.18    | 39.41 | 39.19 | 40.14 | 40.33    | 39.8  | 40.17    | 39.29    | 39.76    | 40.3     | 39.85    | 41.78    | 40.22    | 40.29    | 40.28    | 43.98 | 48.61    | 49.71    | 92.64    |          | 58.43    | 57.52    | 58.33    | 58.32 | 30.44 | 30.45    | 30.84 | 30.63 | 30.88 | 31    | 31.55  | 31.54  | 31.53 | 31.55 | 31.54 |
| <i>S. dysgalactiae</i> WJ0011CP095081IChannel catfishIChinaI2020                              | CP095081 | 39.71    | 39.04    | 39.73    | 39.52    | 39.71 | 39.76 | 40.13 | 40.3     | 40.5  | 40.72    | 39.05    | 39.55    | 40.05    | 40.4     | 40.42    | 40.42    |          | 45.1     | 49.55 | 50.8     | 57.44    | 58.43    |          | 90.4     | 91.71    | 91.7     | 31.12 | 31.13 | 30.7     | 31.58 | 31.58 | 31.33 | 31.42 | 31.41  | 31.42  | 31.41 | 31.41 |       |
| <i>S. dysgalactiae</i> subsp. <i>dysgalactiae</i> STREP97 15ICP033166IISingaporeI2015         | CP033166 | 38.87    | 38.8     | 38.88    | 38.76    | 38.86 | 39.2  | 39.64 | 39.9     | 39.84 | 40.4     | 38.8     | 38.79    | 39.19    | 39.56    | 40.8     | 39.57    | 39.43    | 39.43    | 43.97 | 47.34    | 49.65    | 56.57    | 57.52    | 90.4     |          | 95.32    | 95.32 | 29.91 | 29.92    | 29.88 | 30.13 | 30.01 | 30.95 | 30.78  | 30.76  | 30.78 | 30.77 | 30.7  |
