# Supplementary material for: Genome analysis of Streptococcus spp. isolates from animals in pre-antibiotic era with respect to antibiotic susceptibility and virulence gene profiles
Source: Springer Nature journal article supplement (doi:10.1186/s13567-024-01302-0), 2024-04-15

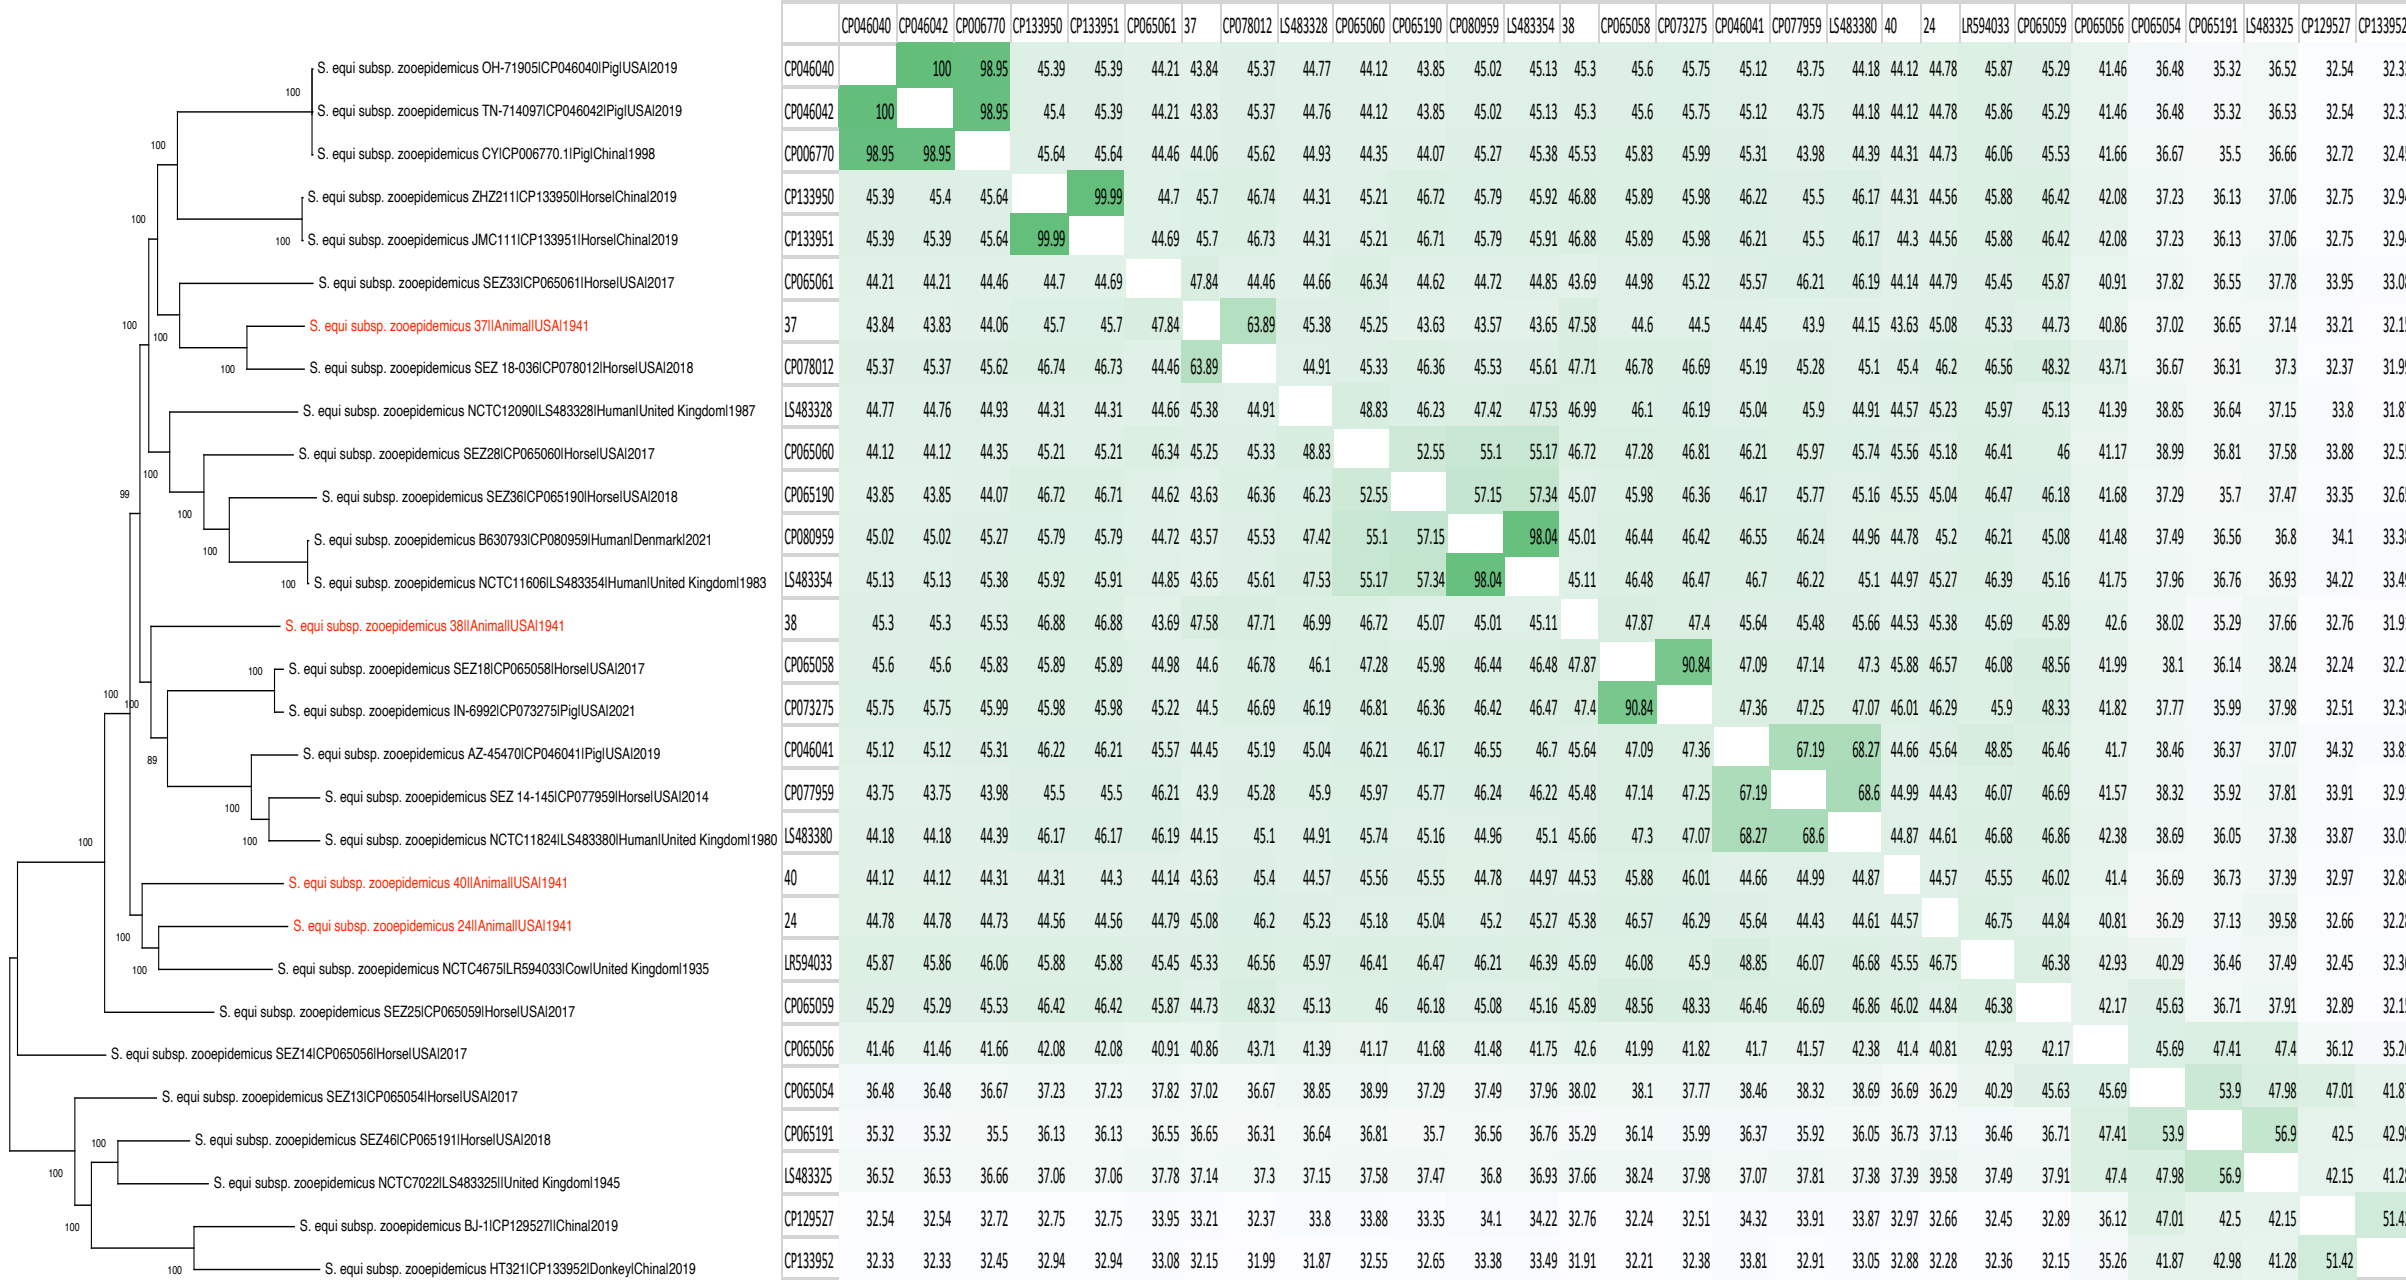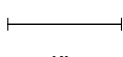

Supplement: MOESM8 [file 13567_2024_1302_MOESM8_ESM.pdf]
